# Supplementary material
Source: HighWire-hosted journal article supplement (https://bmjopen.bmj.com/content/15/1/e090862)
Supplement: inline-supplementary-material-2 [file inline-supplementary-material-2.xlsx]

## Sheet: Feuil1
Author	Title	laboratory affiliation	year of publication	country (study location)	Design	number of children (VR group)	number of children Control group)	Age (VR group)	Age (control group)	Population (VR group) : pathology or difficulties	Population (control group) : pathology or difficulties	Inclusion criteria	Exclusion criteria	Aims category	Aim of the study	rehabilitation program location home, centre, laboratory, school	Name of the VR Device	Nature : immersive or non immersive	Nature of device : commercial or specific	Hand tracking method	Haptic devices	Hardawre : elements of a computer that's physical	Software : anything that tells hardware what to do and how to do it, including computer programs and apps	Description of the VR task or program	description of VR group (VR, VR + conventional therapy, test of VR device)	Control group (Yes/No)	Description of control group (extract from the text)	Description of control group (category) : conventional therapy, commercial VR device, VR device to train cognitive abilities	Sensory feedback : visual, auditive, haptic	Type of feedback (extract from the text)	Type of feedback : verbal, non verbal, knowledge of results, knowledge of performance, immediate, delayed, accumulated, distinct	Program duration	training frequency	session duration	total training time (minute)	exercises modalities (extract from the text)	Exercises modalities (category)	Fine motor skills test	Motivation or engagement mesure	other outcomes	Task specific training : functional task (extract from the text)	Task specific training : functional task (Yes/no)	Task specific training : goal oriented (extract from the text)	Task specific training : goal oriented (Yes/no)	Task specific training : repetiton (extract from the text)	Task specific training : repetiton (Yes/No)	Adverse events (Yes/ No)	If Yes, which adverse events	list of the parameters which may impact fine motor skills training (extract from the studies) (level 1 = explicitly described and linked with the results/outcome)
[truncated: 9 more columns]
